# Supplementary material for: Sodium decahydrido-closo-1-carbadecaborate as a solid electrolyte: new insight into polymorphism and electrochemical performance
Source: Royal Society of Chemistry journal article supplement (doi:10.1039/d4ta02293a), 2024-01-01
Supplement: d4ta02293a1.pdf [file d4ta02293a1.pdf]

# Sodium Decahydrido-*Closo*-1-Carbadecaborate as a Solid Electrolyte: New Insight into Polymorphism and Electrochemical Performance

Therese S. S. Kjær<sup>1</sup>, Jakob B. Grinderslev<sup>1</sup>, Lasse N. Skov<sup>1</sup>, Torben R. Jensen<sup>1</sup>

Interdisciplinary Nanoscience Center (iNANO) and Department of Chemistry, Aarhus University, Langelandsgade 140, DK-8000 Aarhus C, Denmark

\* Corresponding author: trj@chem.au.dk

## Supporting Information

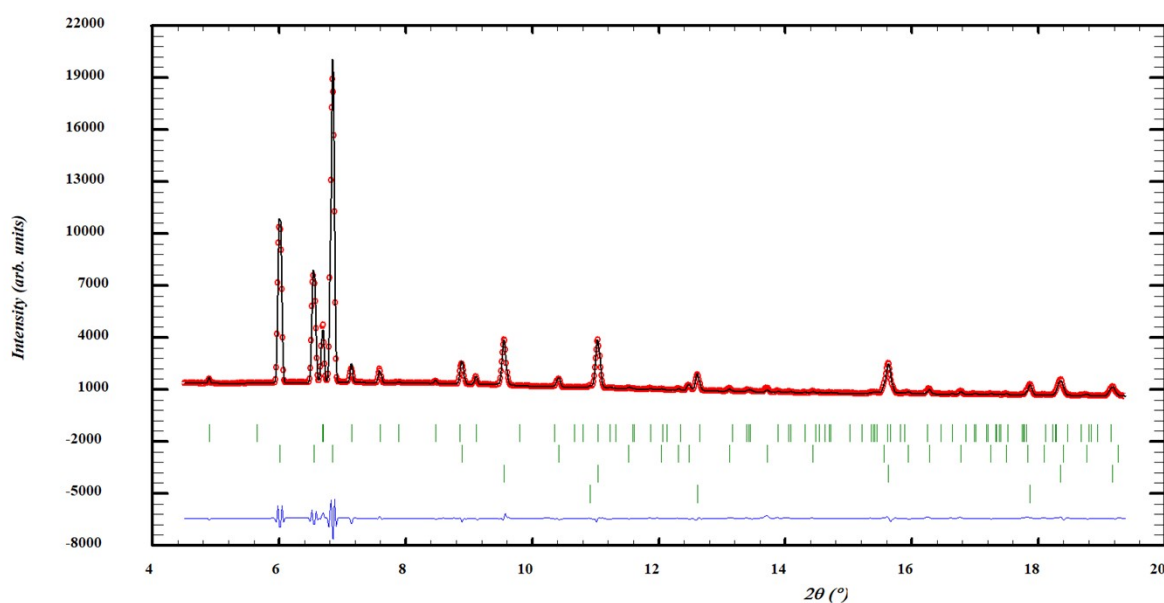

**Figure S1.** Rietveld refinement of SR-PXRD data of NaCB<sub>9</sub>H<sub>10</sub> (**s1**) showing experimental (red circles) and calculated (black line) PXRD patterns, and a difference plot below (blue line) ( $T = 272$  K,  $\lambda = 0.619689$  Å). Green tick marks from top to bottom: *rt*-NaCB<sub>9</sub>H<sub>10</sub>, *ht*-NaCB<sub>9</sub>H<sub>10</sub>, NaI, NaCl. Final discrepancy factors:  $R_p = 2.25$  %,  $R_{wp} = 3.57$  % (not corrected for background),  $R_p = 10.5$  %,  $R_{wp} = 9.54$  % (conventional Rietveld R-factors). Mass fractions: *rt*-NaCB<sub>9</sub>H<sub>10</sub> (22.4 wt%), *ht*-NaCB<sub>9</sub>H<sub>10</sub> (69.7 wt%), NaI (4.8 wt%) and NaCl (3.1 wt%).

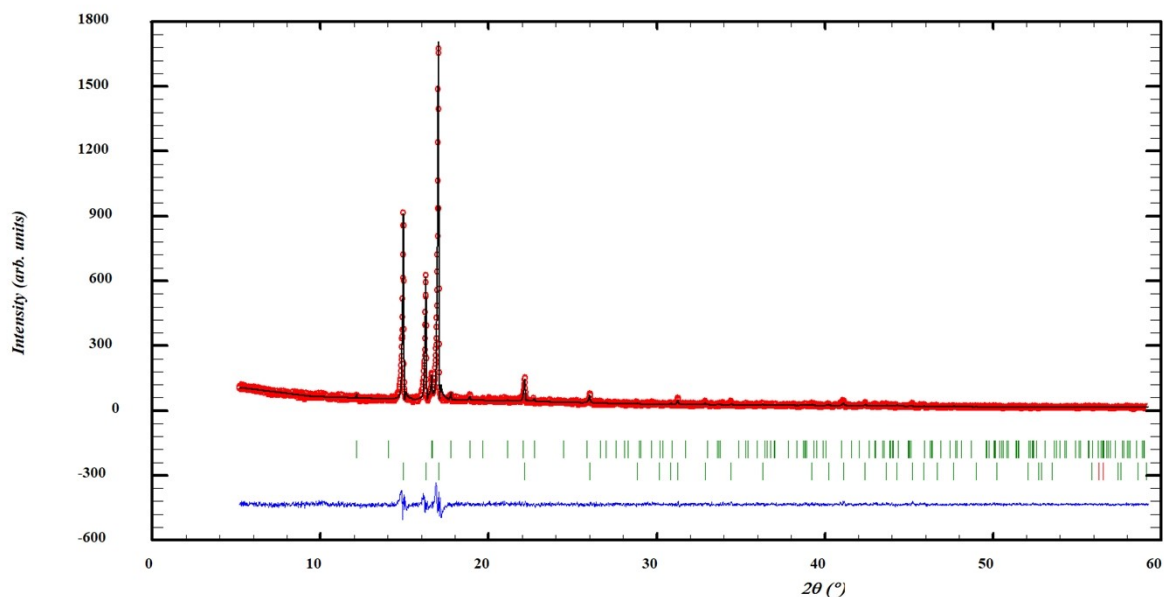

**Figure S2.** Rietveld refinement of PXRD data of as-synthesized *ht*-NaCB<sub>9</sub>H<sub>10</sub> (**s2**) showing experimental (red circles) and calculated (black line) PXRD patterns, and a difference plot below (blue line) ( $T = 294$  K,  $\lambda = 1.5405$  Å). Green tick marks from top to bottom: *rt*-NaCB<sub>9</sub>H<sub>10</sub>, *ht*-NaCB<sub>9</sub>H<sub>10</sub>. Final discrepancy factors:  $R_p = 10.9$  %,  $R_{wp} = 9.60$  % (not corrected for background),  $R_p = 46.8$  %,  $R_{wp} = 11.2$  % (conventional Rietveld R-factors). Mass fractions: *rt*-NaCB<sub>9</sub>H<sub>10</sub> (12.0 wt%), *ht*-NaCB<sub>9</sub>H<sub>10</sub> (88.0 wt%).

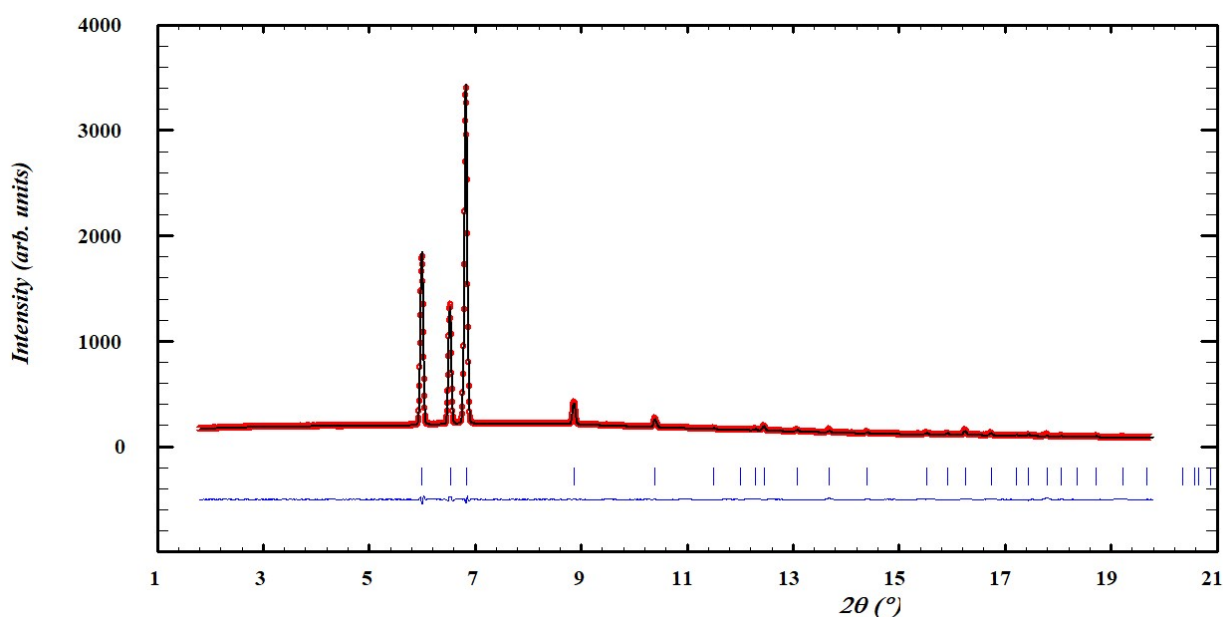

**Figure S3.** Rietveld refinement of SR-PXRD data of *ht*-NaCB<sub>9</sub>H<sub>10</sub> (**s2**) showing experimental (red circles) and calculated (black line) PXRD patterns, and a difference plot below (blue line) ( $T = 294$  K,  $\lambda = 0.6199$  Å). Blue tick marks: *ht*-NaCB<sub>9</sub>H<sub>10</sub>. Final discrepancy factors:  $R_p = 0.859$  %,  $R_{wp} = 1.47$  % (not corrected for background),  $R_p = 4.37$  %,  $R_{wp} = 4.28$  % (conventional Rietveld R-factors),  $R_{\text{Bragg}}(\textit{ht}\text{-NaCB}_9\text{H}_{10}) = 1.63$  % and global  $\chi^2 = 83.8$ .

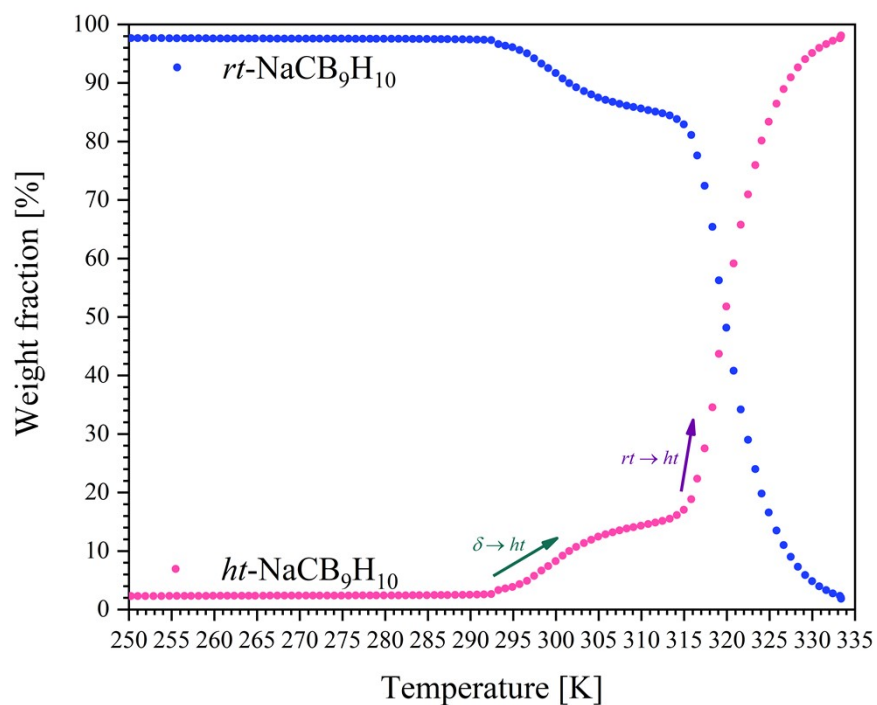

**Figure S4.** Relative weight fractions of crystalline *rt*- (blue) and *ht*-NaCB<sub>9</sub>H<sub>10</sub> (pink) is extracted by Rietveld refinement of SR-PXD data measured of NaCB<sub>9</sub>H<sub>10</sub> (**s1**) during the initial heating, see Figure 2 ( $\Delta T/\Delta t = 5$  K min<sup>-1</sup>). The amount of  $\delta$ -NaCB<sub>9</sub>H<sub>10</sub> in the sample is estimated to 12.8 wt% and used to rescale the fraction of crystalline material. The green arrow marks the initiation of the formation of crystalline *ht*-NaCB<sub>9</sub>H<sub>10</sub> from  $\delta$ -NaCB<sub>9</sub>H<sub>10</sub>, the purple arrow marks the initiation of the polymorphic transition from *rt*- to *ht*-NaCB<sub>9</sub>H<sub>10</sub>.

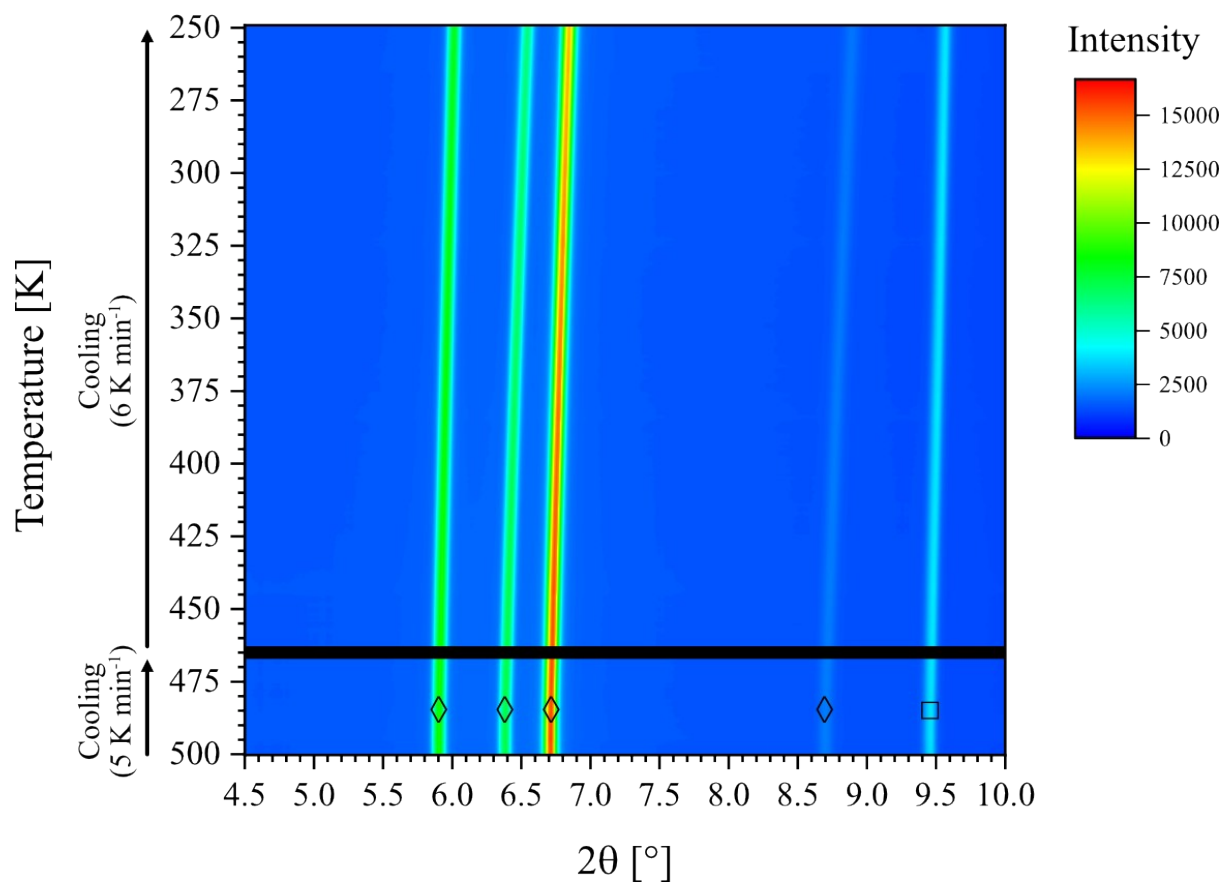

**Figure S5.** *In situ* SR-PXRD of the subsequent cooling of NaCB<sub>9</sub>H<sub>10</sub> (**s1**), i.e. a continuation of the diffraction experiment shown in Figure 2 ( $\lambda = 0.619689 \text{ \AA}$ ,  $\Delta T/\Delta t = 5 \text{ K min}^{-1}$  from 500 to 467 K, and  $\Delta T/\Delta t = 6 \text{ K min}^{-1}$  from 463 to 250 K). Symbols: *ht*-NaCB<sub>9</sub>H<sub>10</sub> (◇), NaI (□).

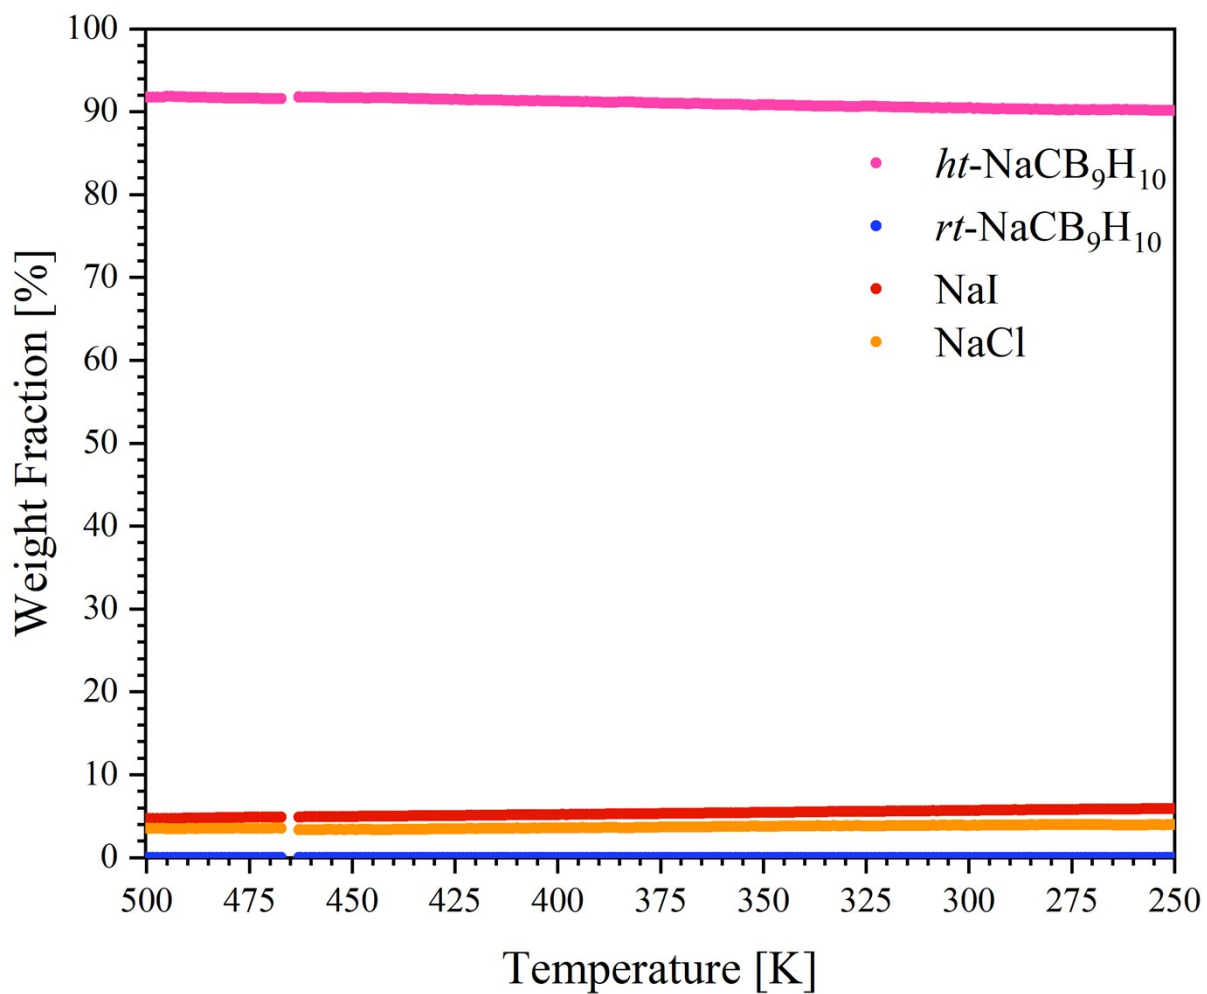

**Figure S6.** Crystalline weight fraction of *rt*- (blue), *ht*-NaCB<sub>9</sub>H<sub>10</sub> (pink), NaI (red) and NaCl (orange) extracted by Rietveld refinement of SR-PXRD data (shown in Figure S4).

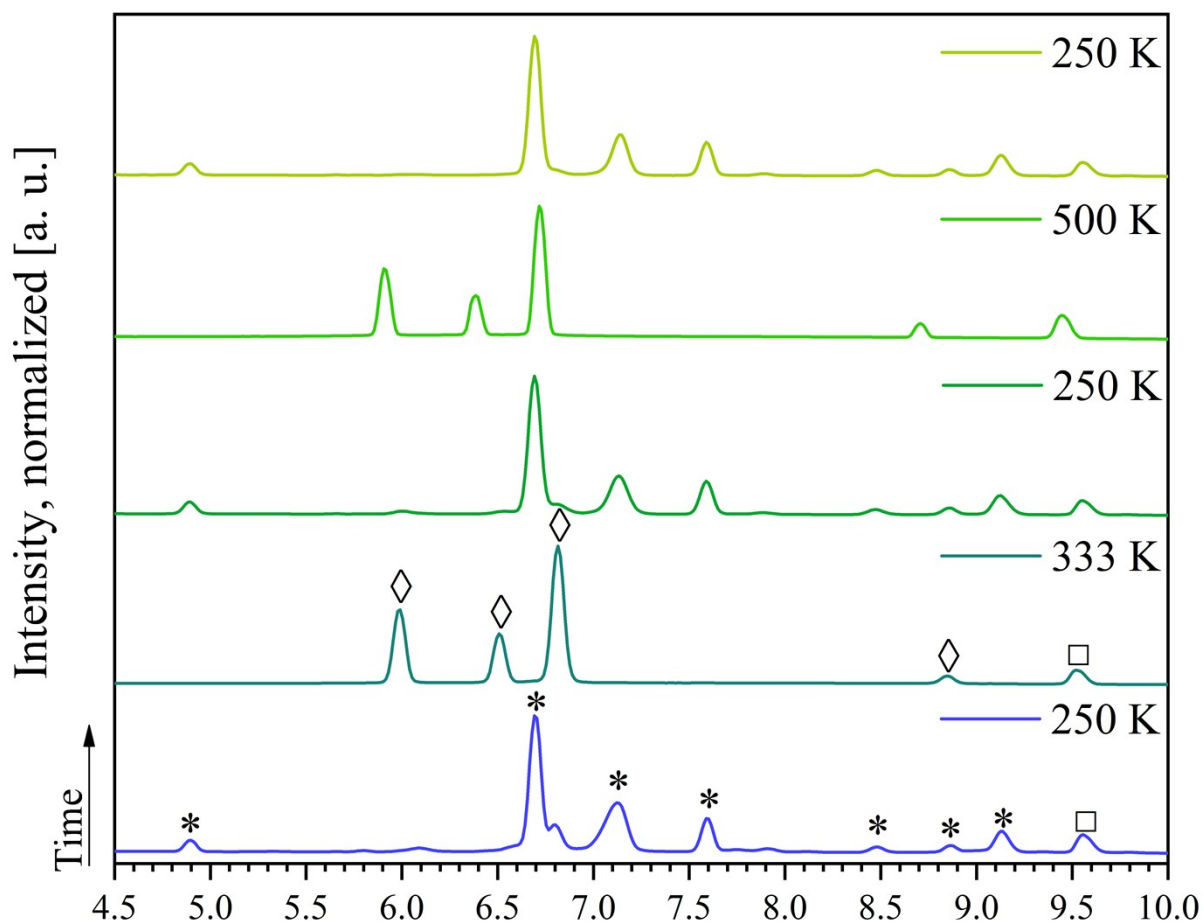

**Figure S7.** SR-PXRD of  $\text{NaCB}_9\text{H}_{10}$  (**s1**) ( $\lambda = 0.619689 \text{ \AA}$ ) at different temperatures. This sample was used for the measurement shown in Figure 2, however the capillary was moved such that a “new” spot on the sample was exposed to the X-rays. Symbols: *rt*- $\text{NaCB}_9\text{H}_{10}$  (\*), *ht*- $\text{NaCB}_9\text{H}_{10}$  (◇), NaI (□).

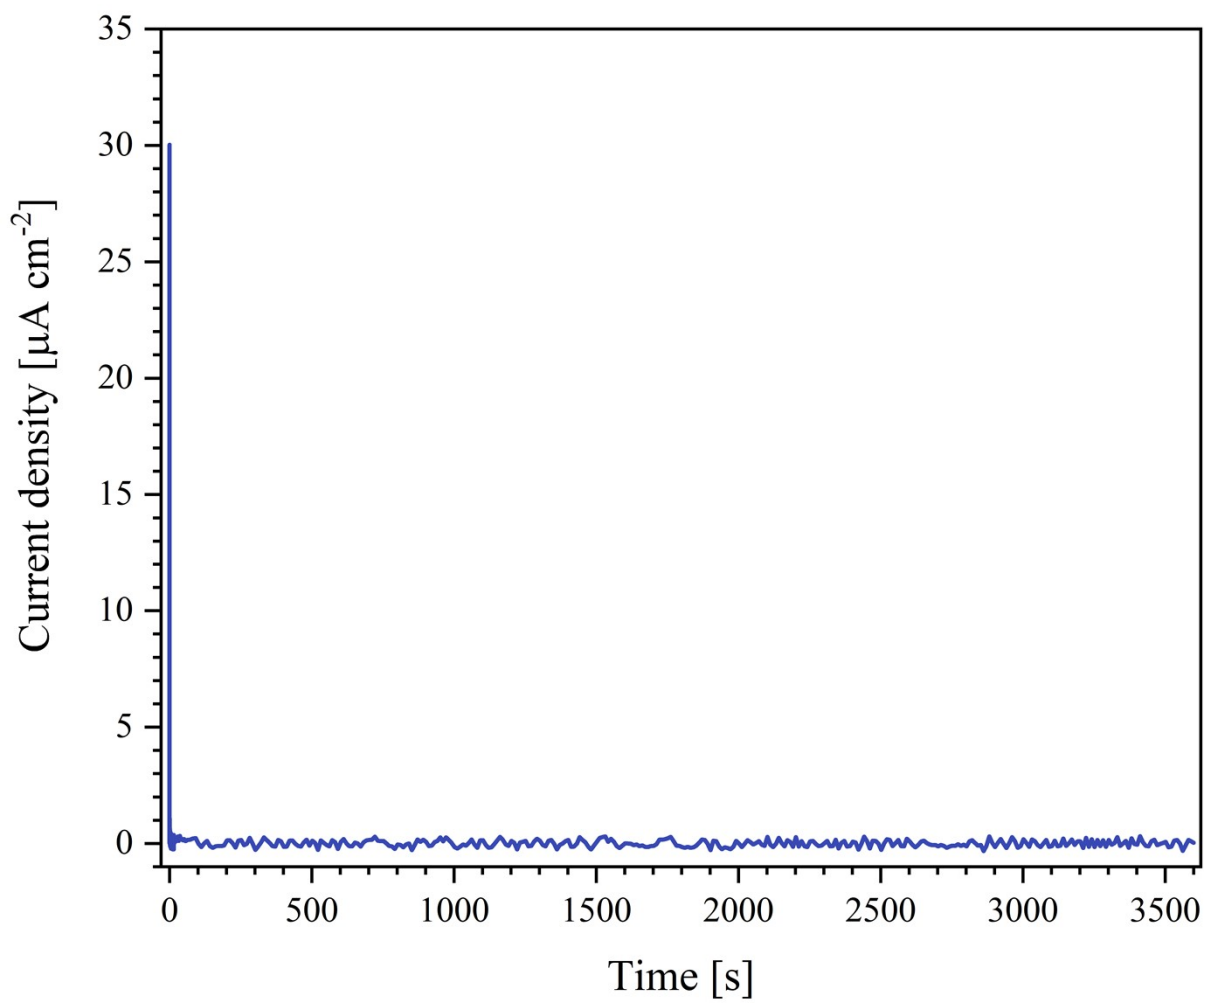

**Figure S8.** A symmetric SS|NaCB<sub>9</sub>H<sub>10</sub> (**s2**)|SS cell to determine the ionic transport number,  $t_{\text{ion}}$ .

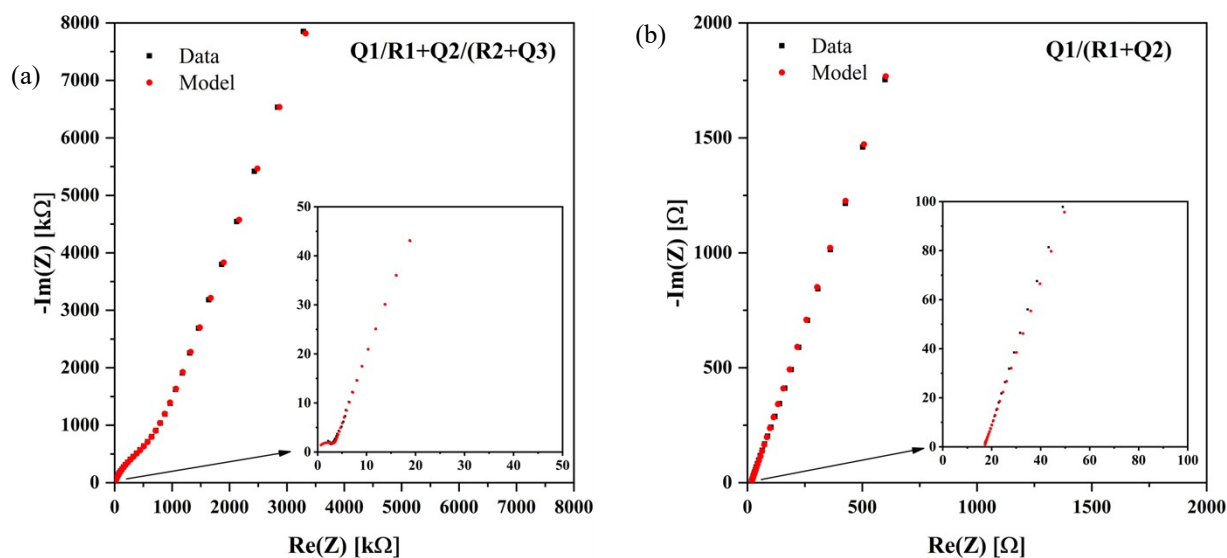

**Figure S9.** Nyquist plots and the corresponding equivalent circuit fits of  $\text{NaCB}_9\text{H}_{10}$  (s1) measured at room temperature before heating (a) and after the first heating cycle (b). The data before heating displays two semicircles, attributed to the presence of both *rt*- $\text{NaCB}_9\text{H}_{10}$  and *ht*- $\text{NaCB}_9\text{H}_{10}$  in the as-synthesized sample. Only a single conducting phase is present after the initial phase transition to *ht*- $\text{NaCB}_9\text{H}_{10}$  at  $T > 333$  K and the semicircle is no longer observed due to the low resistance in *ht*- $\text{NaCB}_9\text{H}_{10}$ .



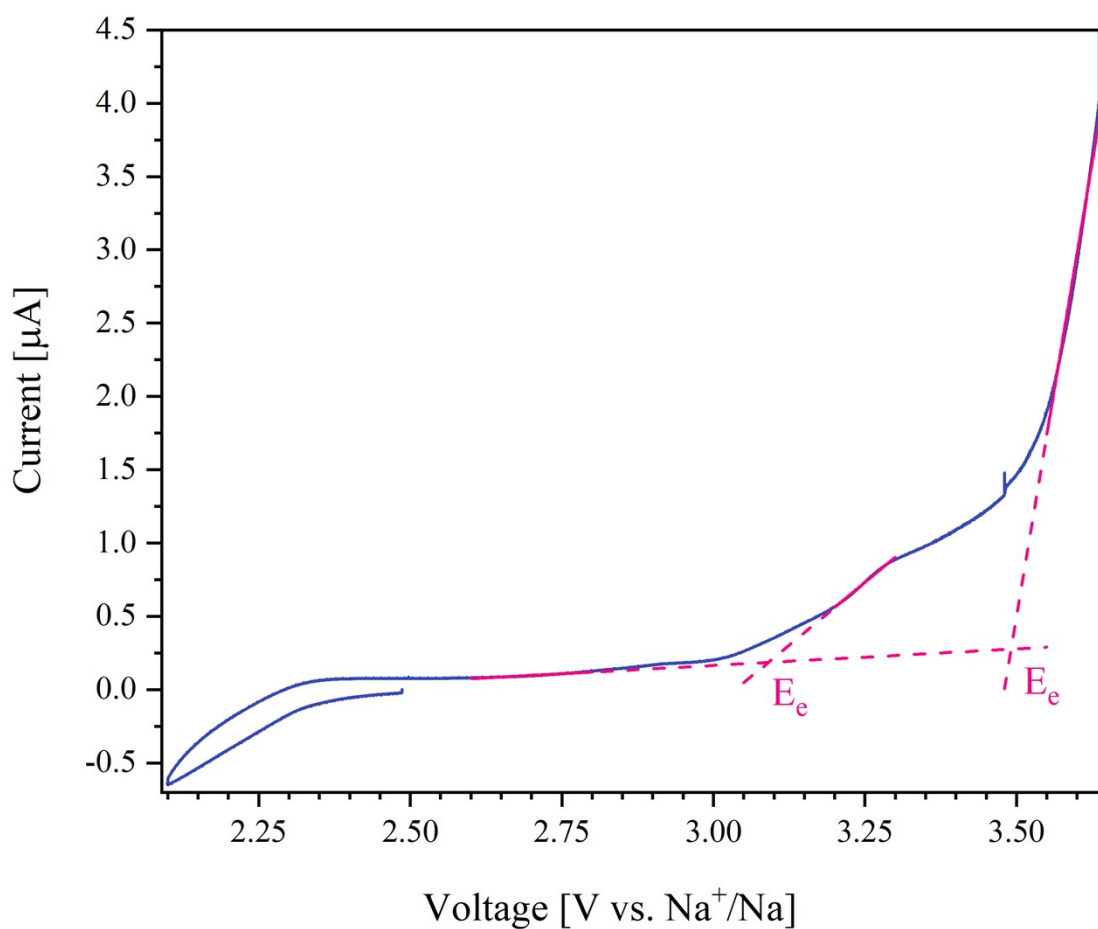

**Figure S10.** Linear sweep voltammetry showed two anodic peaks for  $\text{NaCB}_9\text{H}_{10}$  (**s2**), one with an edge potential of 3.1 V and a larger peak with an edge potential of 3.5 V. At 3.6 V the current increased rapidly skewing the edge potential to a larger value if included.

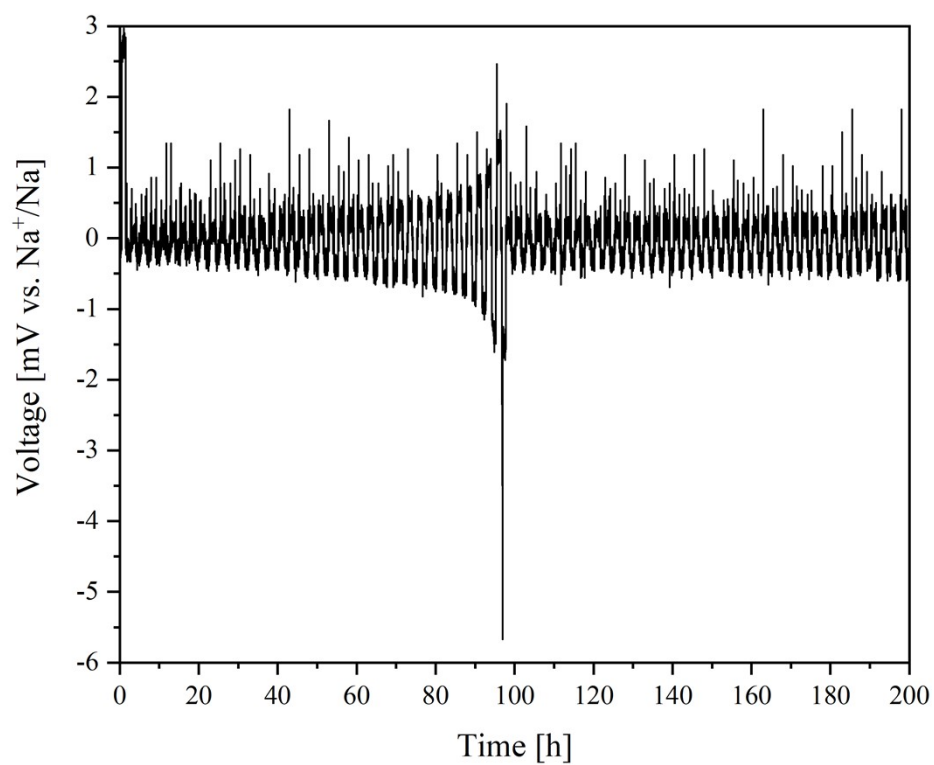

**Figure S11.** Precycling of Na|NaCB<sub>9</sub>H<sub>10</sub> (s1)|Na cell used for critical current density measurement conducted at T = 303 K and 0.2 mA cm<sup>-2</sup> for 80 cycles.

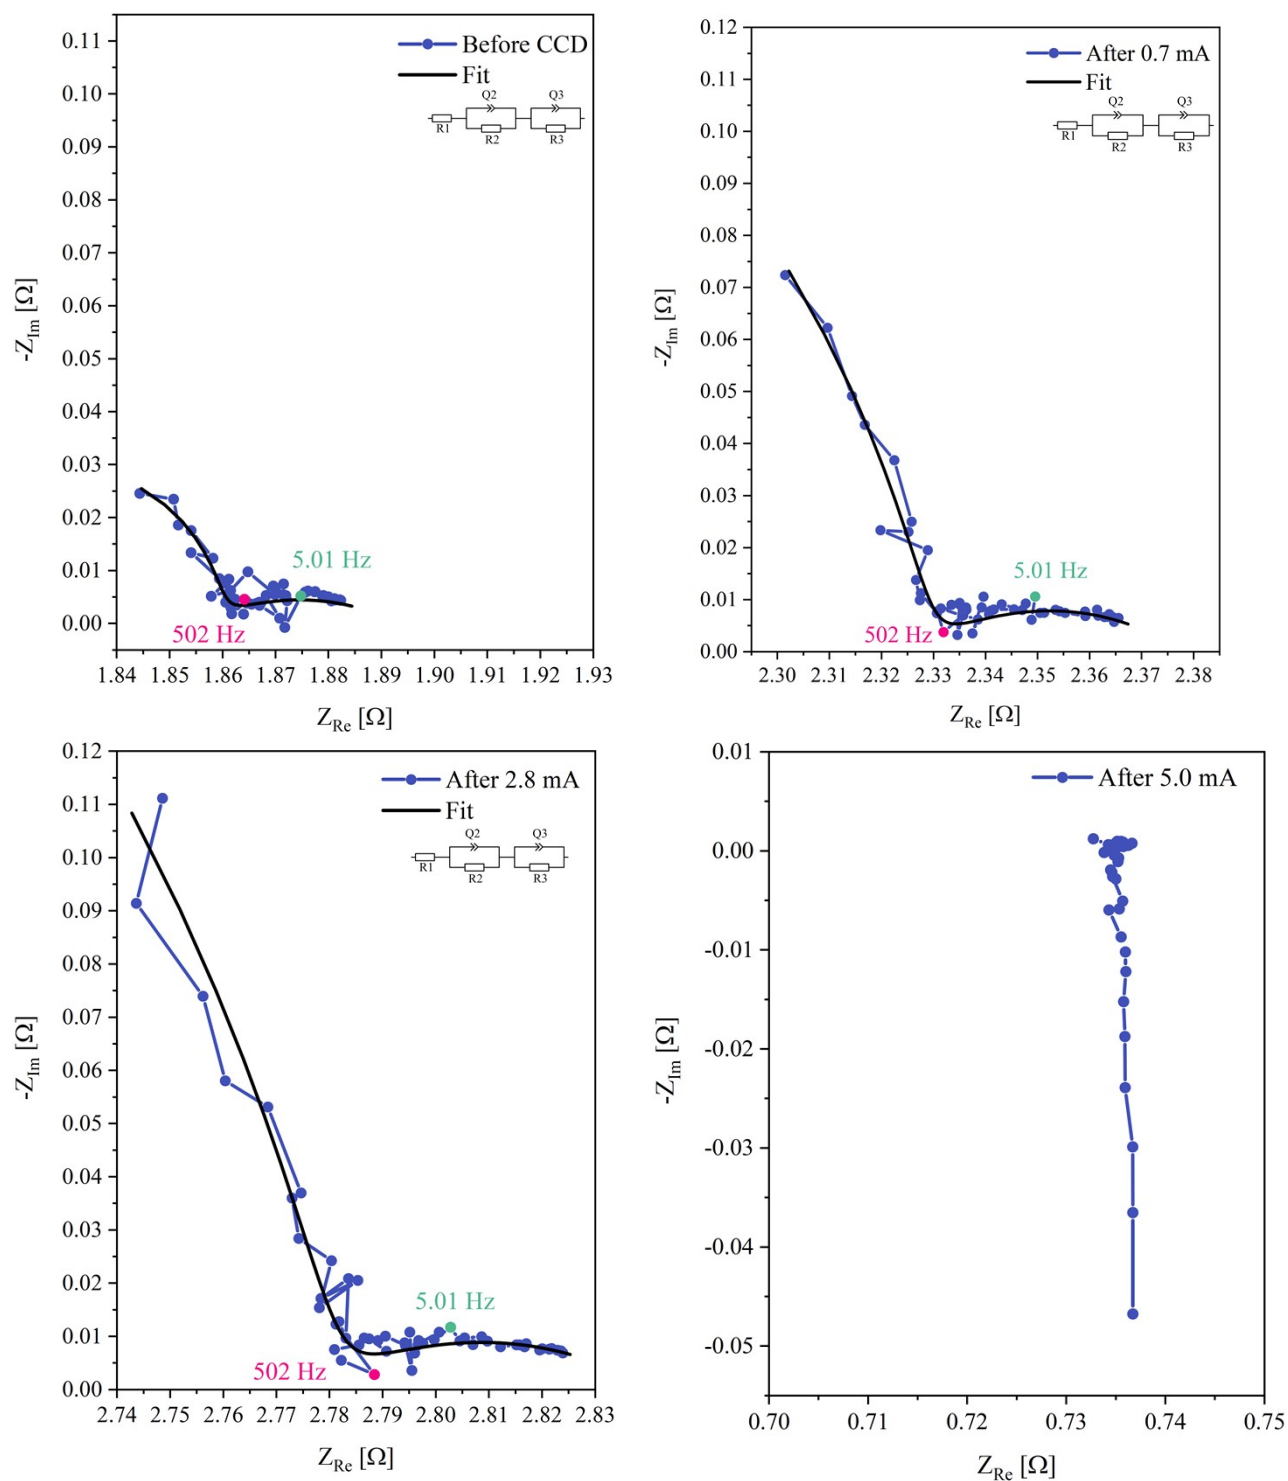

**Figure S12.** Nyquist plot of EIS measurements throughout the investigation of critical current density, raw data (blue) fitted (black) with  $R_1+Q_2/R_2+Q_3/R_3$ .  $R_1$  is ascribed as the internal resistance of the cell,  $R_2$  is associated with the interface between the solid electrolyte and the electrodes,  $R_3$  is ascribed as a low frequency resistance.

**Table S1.** Fitted resistance from Nyquist plot of EIS measurements (Figure S9) throughout the investigation of critical current density.

|    | Before CCD [ $\Omega$ ] | After 0.7 mA [ $\Omega$ ] | After 2.8 mA [ $\Omega$ ] |
|----|-------------------------|---------------------------|---------------------------|
| R1 | 1.799                   | 1.914                     | 2.029                     |
| R2 | 0.05659                 | 0.4126                    | 0.7481                    |
| R3 | 0.03714                 | 0.05091                   | 0.06319                   |
